# Supplementary material
Source: PubMed Central journal article supplement (PMC7231725)
Supplement: mmc3.pdf [file mmc3.pdf]

**Statistics of the scRNA and scVDJ sequencing results.**

|            | scRNA-seq                |                     |                              |             |       | scVDJ-seq                |                     |                            |             |       |
|------------|--------------------------|---------------------|------------------------------|-------------|-------|--------------------------|---------------------|----------------------------|-------------|-------|
|            | Number of cells detected | Mean reads per cell | Mean genes detected per cell | Total reads | Q30 % | Number of cells detected | Mean reads per cell | Number of productive cells | Total reads | Q30 % |
| Patient 1  | 32,551                   | 1,484               | 333                          | 48,308,745  | 76%   | 27,859                   | 4,526               | 17,279                     | 126,083,999 | 87%   |
| Patient 2  | 9,880                    | 2,370               | 515                          | 23,413,679  | 98%   | 9,925                    | 6,590               | 9,484                      | 65,409,208  | 98%   |
| Patient 3  | 5,575                    | 3,908               | 729                          | 21,786,425  | 98%   | 5,401                    | 11,734              | 5,206                      | 63,376,245  | 98%   |
| Patient 4  | 7,523                    | 6,100               | 835                          | 45,891,400  | 98%   | 12,105                   | 10,568              | 11,677                     | 127,928,119 | 86%   |
| Patient 5  | 29,029                   | 3,128               | 615                          | 90,813,480  | 80%   | 27,940                   | 2,912               | 26,030                     | 81,363,174  | 76%   |
| Patient 6  | 7,258                    | 2,702               | 539                          | 19,609,279  | 75%   | 7,366                    | 6,059               | 7,099                      | 44,631,682  | 78%   |
| Patient 7  | 6,269                    | 3,138               | 593                          | 19,673,314  | 75%   | 6,400                    | 6,197               | 6,109                      | 39,658,075  | 77%   |
| Patient 8  | 7,738                    | 2,907               | 489                          | 22,496,801  | 75%   | 8,032                    | 9,514               | 7,406                      | 76,412,687  | 76%   |
| Patient 9  | 5,936                    | 16,537              | 1,242                        | 98,162,900  | 83%   | 5,836                    | 6,757               | 5,563                      | 39,434,213  | 77%   |
| Patient 10 | 13,079                   | 14,382              | 1,332                        | 188,104,614 | 89%   | 12,938                   | 9,205               | 12,536                     | 119,098,397 | 83%   |
| Patient 11 | 13,421                   | 1,384               | 371                          | 18,576,377  | 90%   | 13,292                   | 9,572               | 12,855                     | 127,233,239 | 86%   |
| Patient 12 | 10,136                   | 2,042               | 506                          | 20,701,185  | 89%   | 10,367                   | 10,494              | 9,899                      | 108,794,662 | 86%   |
| Batch 1    | 19,311                   | 2,961               | 618                          | 57,174,894  | 80%   | 19,956                   | 4,373               | 18,911                     | 87,262,694  | 90%   |
| Batch 2    | 19,760                   | 2,699               | 664                          | 53,332,771  | 90%   | 8,642                    | 9,971               | 7,795                      | 86,165,539  | 83%   |
| Batch 3    | 16,701                   | 3,336               | 643                          | 55,708,151  | 84%   | 7,154                    | 9,671               | 6,378                      | 69,185,504  | 77%   |
| Batch 4    | 13,123                   | 5,958               | 1,026                        | 78,191,562  | 89%   | 11,914                   | 6,804               | 11,497                     | 81,065,554  | 76%   |
| Batch 5    | 14,812                   | 6,749               | 917                          | 99,964,928  | 89%   | 8,496                    | 9,461               | 7,664                      | 80,379,542  | 99%   |
| Batch 6    | 6,703                    | 5,462               | 772                          | 36,613,688  | 91%   | 3,244                    | 10,458              | 2,917                      | 33,926,427  | 92%   |

**Table S3. Statistics of the scRNA and scVDJ sequencing results. Related to STAR METHODS - Single-cell 5' mRNA and VDJ sequencing**

## **Cryo-EM data collection and processing statistics**

|                                             | <b>Spike/Ab23-Fab complex</b>      |
|---------------------------------------------|------------------------------------|
| Voltage (kV)                                | 300                                |
| Microscope                                  | FEI Titan Krios G3                 |
| Camera                                      | K2 Summit (Gatan)                  |
| Magnification (calibrated)                  | 130,000X                           |
| Electron exposure ( $e^-/\text{\AA}^2$ )    | 59.8                               |
| Exposure rate                               | $7.1875 e^-/\text{\AA}^2/\text{s}$ |
| Number of frames collected per micrograph   | 32                                 |
| Energy filter slit width                    | 20 eV                              |
| Automation software                         | SerialEM                           |
| Defocus range ( $\mu\text{m}$ )             | -1.5 to -2.5                       |
| Pixel size ( $\text{\AA}$ )                 | 1.055                              |
| Micrographs used                            | 4,411                              |
| Estimated accuracy of translation/rotations | 1.682 degrees, 0.886 pixels        |
| Symmetry imposed                            | C1                                 |
| Initial particle images (no.)               | 1,666,415                          |
| Final particle images (no.)                 | 56,059                             |
| Resolution ( $\text{\AA}$ )                 | 3.84                               |
| FSC threshold                               | 0.143                              |

**Table S4. Cryo-EM data collection and processing statistics. Related to Figure 4.**

**Raw data of BD-368-2 pseudovirus neutralization assay**

| Control (RLU) |               | Neutralization (RLU) |          |         |                    |
|---------------|---------------|----------------------|----------|---------|--------------------|
| Cell Control  | Virus Control |                      | BD-368-2 |         | mAbs dilution-fold |
| 600           | 1917720       | 560                  | 80       | 1040    | 270                |
| 520           | 1876760       | 1240                 | 80       | 1120    | 810                |
| 520           | 1267320       | 1440                 | 120      | 2000    | 2430               |
| 600           | 1670800       | 8000                 | 240      | 59560   | 7290               |
| 880           | 2013480       | 8960                 | 26040    | 70440   | 21870              |
| 1160          | 1910200       | 104880               | 47040    | 88080   | 65610              |
|               |               | 322040               | 305960   | 389240  | 196830             |
|               |               | 1074080              | 1146920  | 538920  | 590490             |
|               |               | 1645920              | 1536720  | 1393600 | 1771470            |
|               |               | 1927640              | 1940440  | 1447000 | 5314410            |
|               |               | 1956080              | 1962200  | 2087560 | 15943230           |
|               |               | 2227920              | 2010520  | 2269720 | 47829690           |

**Table S5. Representative raw data of the pseudovirus neutralization assay using BD-368-2. Related to Figure 2.**

The cell control indicates the background signal when there is no virus added. No antibody was added to the virus control. mAbs were diluted from 1 µg/mL.
